# Supplementary material for: Maternal Age, Early Childhood Temperament, and Youth Outcomes
Source: Oxford University Press journal article supplement (doi:10.1215/00703370-10293348), 2022-10-26
Supplement: yu_esm.pdf [file yu_esm.pdf]

## Online Appendix

### Maternal Age, Early Childhood Temperament, and Youth Outcomes

Wei-hsin Yu and Hope Xu Yan

Table S1: Family Fixed Effects Models with Single Observation per Respondent

|                                      | Achievement score     | Educational attainment | Psychological distress |
|--------------------------------------|-----------------------|------------------------|------------------------|
| Insecure temperament                 | 0.005**<br>(0.002)    | 0.004**<br>(0.002)     | 0.030*<br>(0.013)      |
| Maternal age at birth                | -0.004†<br>(0.002)    | -0.004*<br>(0.002)     | 0.015<br>(0.010)       |
| Insecure temperament × maternal age  | 0.036†<br>(0.020)     | 0.003**<br>(0.001)     | -0.001*<br>(0.000)     |
| Age                                  | -0.219<br>(0.376)     | 0.309***<br>(0.030)    | 0.010<br>(0.009)       |
| Male                                 | -1.167<br>(0.743)     | -0.431***<br>(0.049)   | -0.131***<br>(0.020)   |
| Race/Ethnicity ( <i>ref.</i> White): |                       |                        |                        |
| Black                                | -0.528<br>(5.250)     | 0.189<br>(0.257)       | -0.027<br>(0.100)      |
| Hispanic                             | -9.135*<br>(3.903)    | -0.011<br>(0.192)      | 0.114<br>(0.068)       |
| Native American                      | -4.236<br>(5.010)     | 0.191<br>(0.268)       | 0.089<br>(0.137)       |
| Asian                                | -7.066†<br>(4.083)    | 0.412<br>(0.407)       | -0.058<br>(0.120)      |
| Other                                | -2.809<br>(3.465)     | 0.212<br>(0.177)       | 0.040<br>(0.073)       |
| Firstborn                            | 2.152*<br>(0.896)     | 0.051<br>(0.056)       | 0.035<br>(0.023)       |
| Residence ( <i>ref.</i> rural):      |                       |                        |                        |
| Urban                                | 1.133<br>(1.603)      | -0.017<br>(0.101)      | 0.016<br>(0.040)       |
| Unknown                              | 2.666<br>(3.561)      | -0.064<br>(0.124)      | 0.071<br>(0.072)       |
| Age when temperament assessed        | 0.065<br>(0.043)      | 0.001<br>(0.003)       | -0.001<br>(0.001)      |
| Constant                             | 74.783***<br>(12.343) | 7.457***<br>(0.887)    | 0.177<br>(0.305)       |
| N of observations                    | 6,423                 | 6,851                  | 7,285                  |

Note: Values in parentheses are robust standard errors. The NLSY79-CYA longitudinal weights were applied in estimating the models.

†  $p < .10$  \*  $p < .05$  \*\*  $p < .01$  \*\*\*  $p < .001$

Table S2: Family Fixed Effects Models Predicting Math, Reading Recognition, and Reading Comprehension Test Scores

|                                      | Math                 | Reading recognition  | Reading comprehension |
|--------------------------------------|----------------------|----------------------|-----------------------|
| Insecure temperament                 | -1.168***<br>(0.349) | -0.861*<br>(0.387)   | -0.958**<br>(0.329)   |
| Maternal age at birth                | -0.287<br>(0.261)    | -0.165<br>(0.279)    | -0.473†<br>(0.246)    |
| Insecure temperament × maternal age  | 0.030*<br>(0.013)    | 0.024†<br>(0.014)    | 0.027*<br>(0.012)     |
| Age                                  | -0.040<br>(0.093)    | -0.365***<br>(0.081) | -2.430***<br>(0.087)  |
| Male                                 | 3.257***<br>(0.536)  | -3.666***<br>(0.584) | -1.820***<br>(0.528)  |
| Race/Ethnicity ( <i>ref.</i> White): |                      |                      |                       |
| Black                                | -3.244<br>(3.894)    | -2.080<br>(3.744)    | -0.900<br>(4.001)     |
| Hispanic                             | -8.897***<br>(2.333) | -6.154*<br>(2.614)   | -5.479*<br>(2.452)    |
| Native American                      | -7.029†<br>(3.683)   | 3.641<br>(3.346)     | -3.181<br>(2.870)     |
| Asian                                | -4.092<br>(3.400)    | -3.548<br>(3.168)    | 0.580<br>(2.608)      |
| Other                                | -3.377<br>(2.268)    | -3.034<br>(2.293)    | -3.584<br>(2.465)     |
| Firstborn                            | 1.081†<br>(0.604)    | 3.902***<br>(0.669)  | 4.540***<br>(0.619)   |
| Residence ( <i>ref.</i> rural):      |                      |                      |                       |
| Urban                                | -0.768<br>(0.661)    | -0.446<br>(0.633)    | 0.219<br>(0.683)      |
| Unknown                              | 0.647<br>(1.262)     | 0.942<br>(1.102)     | 0.810<br>(1.081)      |
| Age when temperament assessed        | 0.053†<br>(0.032)    | 0.066†<br>(0.034)    | -0.009<br>(0.030)     |
| Constant                             | 69.640***<br>(7.789) | 71.641***<br>(8.391) | 98.008***<br>(7.296)  |
| N of observations                    | 23,423               | 23,408               | 22,817                |

Note: Values in parentheses are robust standard errors. The NLSY79-CYA longitudinal weights were applied in estimating the models. All test scores are in percentile. The samples for the three models vary slightly because each outcome has different missing values.

†  $p < .10$  \*  $p < .05$  \*\*  $p < .01$  \*\*\*  $p < .001$

Table S3: Family Fixed Effects Models Including Period and Birth Order Indicators

|                                                | Achievement score    |                      | Educational attainment |                      | Psychological distress |                      |
|------------------------------------------------|----------------------|----------------------|------------------------|----------------------|------------------------|----------------------|
|                                                | (1)                  | (2)                  | (3)                    | (4)                  | (5)                    | (6)                  |
| Insecure temperament                           | -0.871**<br>(0.316)  | -0.857**<br>(0.294)  | -0.111***<br>(0.023)   | -0.123***<br>(0.022) | 0.020**<br>(0.007)     | 0.021**<br>(0.007)   |
| Maternal age at birth                          | -0.082<br>(0.245)    | -0.213<br>(0.236)    | -0.046**<br>(0.018)    | -0.067***<br>(0.018) | 0.006<br>(0.006)       | 0.012*<br>(0.006)    |
| Insecure temperament × maternal age            | 0.023*<br>(0.011)    | 0.023*<br>(0.011)    | 0.003***<br>(0.001)    | 0.004***<br>(0.001)  | -0.001*<br>(0.000)     | -0.001*<br>(0.000)   |
| Age                                            | -0.910***<br>(0.072) | -0.960***<br>(0.067) | 0.435***<br>(0.006)    | 0.421***<br>(0.008)  | 0.007**<br>(0.002)     | 0.013***<br>(0.003)  |
| Male                                           | -0.801†<br>(0.479)   | 0.064<br>(0.451)     | -0.415***<br>(0.035)   | -0.375***<br>(0.034) | -0.118***<br>(0.010)   | -0.121***<br>(0.011) |
| Race/Ethnicity ( <i>ref.</i> White):           |                      |                      |                        |                      |                        |                      |
| Black                                          | -2.282<br>(3.353)    | -3.203<br>(3.556)    | -0.103<br>(0.204)      | -0.175<br>(0.210)    | 0.023<br>(0.043)       | 0.033<br>(0.044)     |
| Hispanic                                       | -6.925**<br>(2.213)  | -5.083*<br>(2.071)   | 0.024<br>(0.136)       | 0.098<br>(0.137)     | 0.058<br>(0.040)       | 0.054<br>(0.040)     |
| Native American                                | -1.662<br>(2.382)    | -0.735<br>(2.238)    | 0.210<br>(0.208)       | 0.233<br>(0.206)     | -0.032<br>(0.061)      | -0.031<br>(0.060)    |
| Asian                                          | -2.052<br>(2.240)    | -1.920<br>(2.345)    | 0.045<br>(0.240)       | 0.009<br>(0.229)     | -0.078<br>(0.092)      | -0.071<br>(0.092)    |
| Other                                          | -3.262<br>(2.078)    | -2.270<br>(1.971)    | 0.119<br>(0.123)       | 0.147<br>(0.119)     | 0.009<br>(0.042)       | 0.010<br>(0.042)     |
| Birth order ( <i>ref.</i> 1st):                |                      |                      |                        |                      |                        |                      |
| 2 <sup>nd</sup>                                | -3.421***<br>(0.565) | -2.818***<br>(0.539) | -0.119**<br>(0.038)    | -0.096*<br>(0.038)   | -0.001<br>(0.013)      | -0.002<br>(0.013)    |
| 3 <sup>rd</sup> and later                      | -5.133***<br>(1.012) | -4.315***<br>(0.966) | -0.180*<br>(0.070)     | -0.164*<br>(0.070)   | 0.014<br>(0.023)       | 0.013<br>(0.023)     |
| Residence ( <i>ref.</i> rural):                |                      |                      |                        |                      |                        |                      |
| Urban                                          | -0.454<br>(0.529)    | -0.429<br>(0.506)    | 0.090*<br>(0.041)      | 0.093*<br>(0.041)    | 0.012<br>(0.013)       | 0.011<br>(0.013)     |
| Unknown                                        | 0.769<br>(0.983)     | -0.664<br>(1.128)    | 0.213***<br>(0.055)    | 0.098†<br>(0.056)    | 0.015<br>(0.017)       | -0.012<br>(0.019)    |
| Age when temperament assessed                  | 0.039<br>(0.028)     | 0.016<br>(0.026)     | 0.001<br>(0.003)       | -0.000<br>(0.002)    | -0.001<br>(0.001)      | -0.001<br>(0.001)    |
| <i>Potential mediators:</i>                    |                      |                      |                        |                      |                        |                      |
| Education                                      |                      |                      |                        |                      | -0.018***<br>(0.003)   | -0.019***<br>(0.003) |
| Family structure ( <i>ref.</i> intact family): |                      |                      |                        |                      |                        |                      |
| Single-mother household                        |                      | -0.708<br>(0.548)    |                        | 0.340***<br>(0.043)  |                        | 0.035**<br>(0.013)   |
| Single-father household                        |                      | 3.483<br>(2.142)     |                        | 0.486***<br>(0.073)  |                        | 0.026<br>(0.026)     |
| Adoptive parents/other relatives               |                      | 2.891<br>(2.243)     |                        | 0.410***<br>(0.078)  |                        | 0.052†<br>(0.029)    |
| Independent residence                          |                      | -5.319<br>(13.265)   |                        | 0.244***<br>(0.045)  |                        | -0.003<br>(0.015)    |
| Other                                          |                      | 0.442<br>(1.342)     |                        | 0.404***<br>(0.045)  |                        | 0.025†<br>(0.014)    |
| Number of children at home                     |                      | 0.474<br>(0.390)     |                        | -0.024<br>(0.022)    |                        | -0.004<br>(0.006)    |
| Mother's education                             |                      | -0.076<br>(0.381)    |                        | 0.042<br>(0.031)     |                        | 0.013<br>(0.009)     |

|                                                                               |           |           |          |           |          |          |
|-------------------------------------------------------------------------------|-----------|-----------|----------|-----------|----------|----------|
| Mother's work status ( <i>ref.</i> no job):                                   |           |           |          |           |          |          |
| < 30 weekly hours                                                             |           | -0.150    |          | -0.042    |          | -0.049** |
|                                                                               |           | (0.493)   |          | (0.053)   |          | (0.016)  |
| ≥ 30 weekly hours                                                             |           | -1.383**  |          | 0.084*    |          | -0.019   |
|                                                                               |           | (0.444)   |          | (0.038)   |          | (0.013)  |
| Log family income                                                             |           | 0.064     |          | -0.002    |          | 0.002    |
|                                                                               |           | (0.105)   |          | (0.008)   |          | (0.003)  |
| Missing family income                                                         |           | 8.892     |          | 0.034     |          | -0.012   |
|                                                                               |           | (6.763)   |          | (0.074)   |          | (0.022)  |
| Mother-child relation ( <i>ref.</i> poor):                                    |           |           |          |           |          |          |
| Fair                                                                          |           | 1.062     |          | -0.054    |          | -0.056   |
|                                                                               |           | (2.213)   |          | (0.219)   |          | (0.074)  |
| Good                                                                          |           | 0.476     |          | 0.140     |          | -0.076   |
|                                                                               |           | (2.116)   |          | (0.214)   |          | (0.070)  |
| Excellent                                                                     |           | 1.082     |          | 0.311     |          | -0.084   |
|                                                                               |           | (2.127)   |          | (0.216)   |          | (0.070)  |
| Other                                                                         |           | 3.772     |          | 0.286     |          | 0.005    |
|                                                                               |           | (2.397)   |          | (0.226)   |          | (0.076)  |
| Mother's educational aspiration for child ( <i>ref.</i> high school or less): |           |           |          |           |          |          |
| Some college                                                                  |           | 5.720***  |          | 0.259***  |          | -0.008   |
|                                                                               |           | (0.724)   |          | (0.062)   |          | (0.021)  |
| College                                                                       |           | 11.929*** |          | 0.548***  |          | -0.019   |
|                                                                               |           | (0.788)   |          | (0.063)   |          | (0.021)  |
| Above college                                                                 |           | 16.928*** |          | 0.739***  |          | -0.035   |
|                                                                               |           | (0.876)   |          | (0.075)   |          | (0.025)  |
| Other                                                                         |           | 7.638***  |          | 0.009     |          | -0.122*  |
|                                                                               |           | (1.913)   |          | (0.255)   |          | (0.050)  |
| Time period ( <i>ref.</i> 1986-2000):                                         |           |           |          |           |          |          |
| 2001-2009                                                                     |           | 1.250*    |          | -0.265*** |          | -0.004   |
|                                                                               |           | (0.492)   |          | (0.049)   |          | (0.018)  |
| 2010-2018                                                                     |           | 2.289*    |          | -0.130†   |          | -0.079** |
|                                                                               |           | (0.994)   |          | (0.067)   |          | (0.027)  |
| Constant                                                                      | 76.711*** | 69.844*** | 5.313*** | 4.972***  | 0.526*** | 0.199    |
|                                                                               | (7.000)   | (8.778)   | (0.503)  | (0.695)   | (0.156)  | (0.219)  |
| N of observations                                                             | 23,524    | 23,524    | 23,644   | 23,644    | 28,548   | 28,548   |

Note: Values in parentheses are robust standard errors. The NLSY79-CYA longitudinal weights were applied in estimating the models.

†  $p < .10$  \*  $p < .05$  \*\*  $p < .01$  \*\*\*  $p < .001$

Table S4: Overall, between-family, and within-family standard deviations for key variables

| Variables                         | Mean  | SD    | Between-family SD | Within-family SD |
|-----------------------------------|-------|-------|-------------------|------------------|
| Insecure temperament              | 18.25 | 4.45  | 3.78              | 2.64             |
| Maternal age at birth             | 26.32 | 5.36  | 4.87              | 3.22             |
| Achievement score (in percentile) | 54.08 | 24.70 | 20.63             | 14.30            |
| Educational attainment (in years) | 12.23 | 1.92  | 1.34              | 1.44             |
| Psychological distress            | .62   | 0.53  | 0.33              | 0.44             |

Note: The statistics for insecure temperament and maternal age at birth are based on the full sample (N=55,060), whereas achievement score, educational attainment, and psychological distress are based on the respective sample for each outcome. The statistics here are unweighted, which is why the mean values are slightly different from those presented in Table A1.

Table S5: Unweighted Family Fixed Effects Models Predicting Youth Outcomes

|                                      | Achievement<br>score | Educational<br>attainment | Psychological<br>distress |
|--------------------------------------|----------------------|---------------------------|---------------------------|
| Insecure temperament                 | -0.675*<br>(0.270)   | -0.082***<br>(0.021)      | 0.019**<br>(0.006)        |
| Maternal age at birth                | 0.005<br>(0.206)     | -0.024<br>(0.016)         | 0.005<br>(0.004)          |
| Insecure temperament × maternal age  | 0.019†<br>(0.010)    | 0.002**<br>(0.001)        | -0.001*<br>(0.000)        |
| Age                                  | -1.062***<br>(0.044) | 0.384***<br>(0.005)       | 0.003***<br>(0.001)       |
| Male                                 | -1.214**<br>(0.427)  | -0.423***<br>(0.031)      | -0.103***<br>(0.009)      |
| Race/Ethnicity ( <i>ref.</i> White): |                      |                           |                           |
| Black                                | -1.093<br>(3.238)    | -0.094<br>(0.221)         | 0.024<br>(0.050)          |
| Hispanic                             | -5.753***<br>(1.692) | -0.023<br>(0.128)         | 0.052<br>(0.037)          |
| Native American                      | -1.937<br>(2.746)    | 0.132<br>(0.222)          | -0.041<br>(0.060)         |
| Asian                                | -4.790*<br>(2.397)   | 0.053<br>(0.190)          | 0.042<br>(0.079)          |
| Other                                | -2.681<br>(1.716)    | 0.071<br>(0.126)          | -0.019<br>(0.037)         |
| Firstborn                            | 3.896***<br>(0.501)  | 0.097**<br>(0.035)        | -0.007<br>(0.011)         |
| Residence ( <i>ref.</i> rural):      |                      |                           |                           |
| Urban                                | -0.262<br>(0.436)    | 0.097**<br>(0.036)        | 0.012<br>(0.011)          |
| Unknown                              | 0.308<br>(0.568)     | 0.189***<br>(0.047)       | 0.013<br>(0.015)          |
| Age when temperament assessed        | 0.019<br>(0.024)     | 0.001<br>(0.002)          | -0.001**<br>(0.000)       |
| Constant                             | 67.517***<br>(6.098) | 5.467***<br>(0.444)       | 0.592***<br>(0.130)       |
| N of observations                    | 23,524               | 23,644                    | 28,548                    |

Note: Values in parentheses are robust standard errors.

†  $p < .10$  \*  $p < .05$  \*\*  $p < .01$  \*\*\*  $p < .001$
